# Supplementary material for: A Novel “Reactomics” Approach for Cancer Diagnostics
Source: Sensors (Basel). 2012 May 2;12(5):5572–85. doi: 10.3390/s120505572 (PMC3386700; doi:10.3390/s120505572)

## Supplementary Information

# A Novel “Reactomics” Approach for Cancer Diagnostics.

## Sensors 2012, 12, 5572-5585

Sofiya Kolusheva <sup>1,†</sup>, Rami Yossef <sup>2,†</sup>, Aleksandra Kugel <sup>2</sup>, Nirit Hanin-Avraham <sup>1</sup>,  
Meital Cohen <sup>2</sup>, Eitan Rubin <sup>2</sup> and Angel Porgador <sup>2,\*</sup>

<sup>1</sup> Ilse Katz Institute for Nanoscale Science and Technology, Ben Gurion University of the Negev, Beer Sheva 84105, Israel; E-Mails: kolushev@bgu.ac.il (S.K.); nirithanin@yahoo.com (N.H.-A.)

<sup>2</sup> The Shraga Segal Department of Microbiology and Immunology and the National Institute for Biotechnology in the Negev, Ben Gurion University of the Negev, Beer Sheva 84105, Israel; E-Mails: yossefra@bgu.ac.il (R.Y.); sasha.kugel@gmail.com (A.K.); kupervaser@yahoo.com (M.C.); erubin@bgu.ac.il (E.R.)

<sup>†</sup> These authors contributed equally to this work.

\* Author to whom correspondence should be addressed; E-Mail: angel@bgu.ac.il;  
Tel.: +972-8-647-7283; Fax: +972-8-647-7626.

**Table S1.** Age distribution, gender and clinical characteristics of sera samples used. All samples were collected and stored at Fundeni Clinical Institute Bucharest, Romania by RNTech Company. Samples were shipped to Ben-Gurion University, Israel and processed following established protocols (see Methods). Abbreviations: AJCC/UICC TNM classification, American Joint Committee on Cancer (AJCC)/International Union against Cancer (UICC) tumor-node-metastasis (TNM) classification.

| Group   | Age at Excision | Sex | Clinical Diagnosis (specimen) | AJCC/UICC TNM classification | AJCC/UICC Stage Group |
|---------|-----------------|-----|-------------------------------|------------------------------|-----------------------|
| Stomach | 75              | F   | Adenocarcinoma                | T2bN2M0                      | IIIA                  |
| Stomach | 63              | M   | Adenocarcinoma                | T2bN0M0                      | IB                    |
| Stomach | 55              | M   | Adenocarcinoma                | T2aN0M0                      | IB                    |
| Stomach | 64              | F   | Adenocarcinoma                | T2bN2M1                      | IV                    |
| Stomach | 58              | M   | Adenocarcinoma                | T4N2M0                       | IV                    |
| Stomach | 70              | F   | Adenocarcinoma                | T3N2M0                       | IIIB                  |
| Stomach | 67              | M   | Adenocarcinoma                | T2aN0M0                      | IB                    |
| Stomach | 66              | F   | Adenocarcinoma                | T2aN1M0                      | II                    |
| Stomach | 66              | F   | Adenocarcinoma                | T2bN1M0                      | II                    |
| Stomach | 59              | M   | Adenocarcinoma                | T2aN2M0                      | IIIA                  |
| Stomach | 63              | F   | Adenocarcinoma                | T2AN1M0                      | II                    |

Table S1. *Cont.*

| Group    | Age at Excision | Sex | Clinical Diagnosis (specimen) | AJCC/UICC TNM classification | AJCC/UICC Stage Group |
|----------|-----------------|-----|-------------------------------|------------------------------|-----------------------|
| Stomach  | 61              | M   | Adenocarcinoma                | T2bN1M0                      | II                    |
| Stomach  | 65              | F   | Adenocarcinoma                | T2aN1M1                      | IV                    |
| Stomach  | 62              | M   | Adenocarcinoma                | T2aN2M0                      | IIIA                  |
| Stomach  | 65              | M   | Adenocarcinoma                | T3N3M0                       | IV                    |
| Stomach  | 65              | M   | Adenocarcinoma                | T2bN0M0                      | IB                    |
| Stomach  | 74              | M   | Adenocarcinoma                | T2bN2M0                      | IIIA                  |
| Stomach  | 75              | F   | Adenocarcinoma                | T2bN1M0                      | II                    |
| Stomach  | 68              | M   | Adenocarcinoma                | T3N1M0                       | IIIA                  |
| Stomach  | 63              | M   | Adenocarcinoma                | T3N2M0                       | IIIB                  |
| Stomach  | 69              | M   | Adenocarcinoma                | T2bN1M0                      | II                    |
| Stomach  | 72              | M   | Adenocarcinoma                | T2bN2M0                      | IIIA                  |
| Stomach  | 66              | M   | Adenocarcinoma                | T2bN2M0                      | IIIA                  |
| Stomach  | 63              | M   | Adenocarcinoma                | T2bN1M0                      | II                    |
| Stomach  | 63              | M   | Adenocarcinoma                | T2bN1M0                      | II                    |
| Stomach  | 69              | M   | Adenocarcinoma                | T2bN1M0                      | II                    |
| Stomach  | 59              | M   | Adenocarcinoma                | T4N2M0                       | IV                    |
| Stomach  | 60              | M   | Adenocarcinoma                | T2aN2M0                      | IIIA                  |
| Stomach  | 70              | F   | Adenocarcinoma                | T2aN1M0                      | II                    |
| Stomach  | 66              | M   | Adenocarcinoma                | T2bN1M1                      | IV                    |
| Stomach  | 59              | M   | Adenocarcinoma                | T2aN1M0                      | II                    |
| Stomach  | 57              | F   | Adenocarcinoma                | T2bN0M0                      | IIA                   |
| Stomach  | 64              | M   | Adenocarcinoma                | T2bN1M0                      | II                    |
| Stomach  | 45              | M   | Adenocarcinoma                | T4N2M0                       | IV                    |
| Stomach  | 69              | M   | Adenocarcinoma                | T2aN2M0                      | IIIA                  |
| Stomach  | 63              | M   | Adenocarcinoma                | T2bN2M0                      | IIIA                  |
| Stomach  | 65              | M   | Adenocarcinoma                | T2bN0M0                      | IIA                   |
| Stomach  | 53              | M   | Adenocarcinoma                | T2bN0M0                      | IIA                   |
| Stomach  | 67              | M   | Adenocarcinoma                | T2N1M0                       | II                    |
| Stomach  | 68              | M   | Adenocarcinoma                | T2aN0M0                      | IIA                   |
| Stomach  | 57              | M   | Adenocarcinoma                | T3N2M0                       | IIIB                  |
| Stomach  | 59              | F   | Adenocarcinoma                | T3N1M0                       | IIIA                  |
| Stomach  | 56              | F   | Adenocarcinoma                | T2bN3M0                      | IV                    |
| Stomach  | 56              | M   | Adenocarcinoma                | T2aN0M0                      | IIA                   |
| Stomach  | 59              | M   | Adenocarcinoma                | T3N2M1                       | IV                    |
| Stomach  | 77              | M   | Adenocarcinoma                | T2bN1M0                      | II                    |
| Stomach  | 65              | M   | Adenocarcinoma                | T2aN0M0                      | IIA                   |
| Stomach  | 71              | M   | Adenocarcinoma                | T3N2M1                       | IV                    |
| Stomach  | 66              | M   | Adenocarcinoma                | T3N2M0                       | IIIB                  |
| Stomach  | 52              | M   | Adenocarcinoma                | T3N0M0                       | II                    |
| Pancreas | 64              | F   | Adenocarcinoma                | T1N1M0                       | IIB                   |
| Pancreas | 69              | F   | Carcinome                     | T3N0M0                       | IIA                   |
| Pancreas | 58              | M   | Carcinome                     | T1N1M0                       | IIB                   |

Table S1. *Cont.*

| Group    | Age at Excision | Sex | Clinical Diagnosis (specimen) | AJCC/UICC TNM classification | AJCC/UICC Stage Group |
|----------|-----------------|-----|-------------------------------|------------------------------|-----------------------|
| Pancreas | 72              | F   | Adenocarcinoma                | T3N0M1                       | IV                    |
| Pancreas | 60              | M   | Adenocarcinoma                | T3N0M0                       | IIA                   |
| Pancreas | 56              | F   | Adenocarcinoma                | T2N0M0                       | IB                    |
| Pancreas | 59              | F   | Adenocarcinoma                | T1N1M1                       | IV                    |
| Pancreas | 77              | M   | Carcinome                     | T2N0M0                       | IB                    |
| Pancreas | 69              | F   | Carcinome                     | T3N1M0                       | IIB                   |
| Pancreas | 55              | M   | Carcinome                     | T1N1M0                       | IIB                   |
| Pancreas | 52              | F   | Carcinome                     | T2N0M0                       | IB                    |
| Pancreas | 75              | M   | Carcinome                     | T2N0M0                       | IB                    |
| Pancreas | 64              | M   | Carcinome                     | T2N0M0                       | IB                    |
| Pancreas | 61              | F   | Carcinome                     | T2N1M0                       | IIB                   |
| Pancreas | 46              | M   | Carcinome                     | T2N1M0                       | IIB                   |
| Pancreas | 59              | F   | Carcinome                     | T3N0M0                       | IIA                   |
| Pancreas | 74              | M   | ADK, benign disease           | T2N0M0                       | IB                    |
| Pancreas | 52              | F   | Carcinome                     | T2N1M0                       | IIB                   |
| Pancreas | 67              | F   | Adenocarcinoma                | T2N1M0                       | IIB                   |
| Pancreas | 73              | F   | Adenocarcinoma                | T3N1M0                       | IIB                   |
| Pancreas | 52              | M   | Carcinome                     | T3N0M0                       | IIA                   |
| Pancreas | 54              | F   | Carcinome                     | T2N1M1                       | IV                    |
| Pancreas | 62              | F   | Carcinome                     | T2N1M0                       | IIB                   |
| Pancreas | 65              | M   | Adenocarcinoma                | T3N0M0                       | IIA                   |
| Pancreas | 67              | M   | Adenocarcinoma                | T2N1M0                       | IIB                   |
| Pancreas | 57              | M   | Adenocarcinoma                | T2N1M1                       | IV                    |
| Pancreas | 45              | M   | Adenocarcinoma                | T2N0M0                       | IB                    |
| Pancreas | 67              | F   | Carcinome                     | T4N0M0                       | III                   |
| Pancreas | 53              | M   | Adenocarcinoma                | T2N1M0                       | IIB                   |
| Pancreas | 64              | F   | Adenocarcinoma                | T1N0M0                       | IA                    |
| Pancreas | 42              | F   | Adenocarcinoma                | T2N0M0                       | IB                    |
| Pancreas | 54              | M   | Adenocarcinoma                | T3N1M0                       | IIB                   |
| Pancreas | 59              | F   | Carcinome                     | T1N0M0                       | IA                    |
| Pancreas | 71              | M   | Adenocarcinoma                | T3N1M0                       | IIB                   |
| Pancreas | 54              | M   | Adenocarcinoma                | T3N1M0                       | IIB                   |
| Pancreas | 66              | F   | Adenocarcinoma                | T3N1M0                       | IIB                   |
| Pancreas | 60              | M   | Adenocarcinoma                | T3N1M0                       | IIB                   |
| Pancreas | 60              | M   | Adenocarcinoma                | T3N1M0                       | IIB                   |
| Pancreas | 61              | M   | Adenocarcinoma                | T3N1M0                       | IIB                   |
| Pancreas | 60              | M   | Adenocarcinoma                | T2N0M0                       | IB                    |
| Pancreas | 61              | M   | Adenocarcinoma                | T3N0M0                       | IIA                   |
| Pancreas | 53              | F   | Adenocarcinoma                | T2N0M0                       | IB                    |
| Pancreas | 71              | M   | Adenocarcinoma                | T3N0M0                       | IIA                   |
| Pancreas | 45              | M   | Adenocarcinoma                | T3N0M0                       | IIA                   |
| Pancreas | 77              | F   | Adenocarcinoma                | T3N0M0                       | IIA                   |

Table S1. *Cont.*

| Group    | Age at Excision | Sex | Clinical Diagnosis (specimen) | AJCC/UICC TNM classification | AJCC/UICC Stage Group |
|----------|-----------------|-----|-------------------------------|------------------------------|-----------------------|
| Pancreas | 66              | F   | Carcinome                     | T2N0M0                       | IB                    |
| Pancreas | 72              | M   | Adenocarcinoma                | T3N0M0                       | IIA                   |
| Pancreas | 51              | M   | Adenocarcinoma                | T2N0M0                       | IB                    |
| Pancreas | 59              | M   | Adenocarcinoma                | T3N1M0                       | IIB                   |
| Pancreas | 59              | F   | Adenocarcinoma                | T1N1M1                       | IIB                   |
| Control  | 65              | F   |                               |                              |                       |
| Control  | 68              | M   |                               |                              |                       |
| Control  | 75              | M   |                               |                              |                       |
| Control  | 65              | M   |                               |                              |                       |
| Control  | 66              | F   |                               |                              |                       |
| Control  | 66              | M   |                               |                              |                       |
| Control  | 66              | M   |                               |                              |                       |
| Control  | 70              | M   |                               |                              |                       |
| Control  | 69              | F   |                               |                              |                       |
| Control  | 67              | F   |                               |                              |                       |
| Control  | 76              | M   |                               |                              |                       |
| Control  | 67              | F   |                               |                              |                       |
| Control  | 71              | F   |                               |                              |                       |
| Control  | 70              | F   |                               |                              |                       |
| Control  | 58              | M   |                               |                              |                       |
| Control  | 69              | M   |                               |                              |                       |
| Control  | 73              | F   |                               |                              |                       |
| Control  | 65              | M   |                               |                              |                       |
| Control  | 72              | F   |                               |                              |                       |
| Control  | 56              | M   |                               |                              |                       |
| Control  | 34              | F   |                               |                              |                       |
| Control  | 28              | F   |                               |                              |                       |
| Control  | 27              | F   |                               |                              |                       |
| Control  | 28              | M   |                               |                              |                       |
| Control  | 27              | F   |                               |                              |                       |
| Control  | 26              | F   |                               |                              |                       |
| Control  | 27              | M   |                               |                              |                       |
| Control  | 31              | M   |                               |                              |                       |
| Control  | 29              | F   |                               |                              |                       |
| Control  | 28              | F   |                               |                              |                       |
| Control  | 19              | M   |                               |                              |                       |
| Control  | 30              | F   |                               |                              |                       |
| Control  | 40              | M   |                               |                              |                       |
| Control  | 32              | F   |                               |                              |                       |
| Control  | 43              | F   |                               |                              |                       |
| Control  | 27              | F   |                               |                              |                       |
| Control  | 26              | F   |                               |                              |                       |
| Control  | 40              | M   |                               |                              |                       |
| Control  | 30              | M   |                               |                              |                       |
| Control  | 28              | F   |                               |                              |                       |
| Control  | 29              | F   |                               |                              |                       |

Table S1. *Cont.*

| Group   | Age at Excision | Sex | Clinical Diagnosis (specimen) | AJCC/UICC TNM classification | AJCC/UICC Stage Group |
|---------|-----------------|-----|-------------------------------|------------------------------|-----------------------|
| Control | 30              | M   |                               |                              |                       |
| Control | 36              | F   |                               |                              |                       |
| Control | 30              | F   |                               |                              |                       |
| Control | 26              | M   |                               |                              |                       |
| Control | 33              | M   |                               |                              |                       |
| Control | 29              | F   |                               |                              |                       |
| Control | 40              | F   |                               |                              |                       |
| Control | 33              | F   |                               |                              |                       |
| Control | 26              | F   |                               |                              |                       |

**Figure S1.** Representative measurement of %FCR following incubation of healthy donor-serum with chromatic lipid-PDA vesicles in different time points.

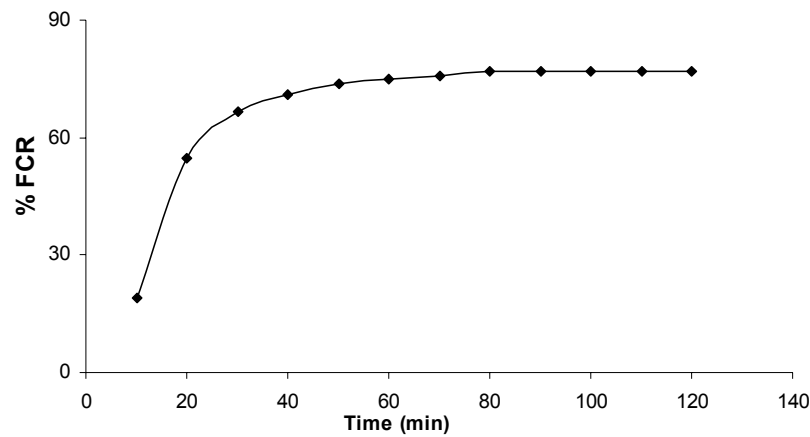

**Figure S2.** Five control sera (S1 to S5) were tested in a 10-repeat assay for the chromatic response induced by 10 different chromatic lipid-PDA vesicles (X-axis, see Table 1). For each serum and chromatic vesicle, RSD of the 10-repeats is presented and the black line represents the average RSD for the 5 sera.

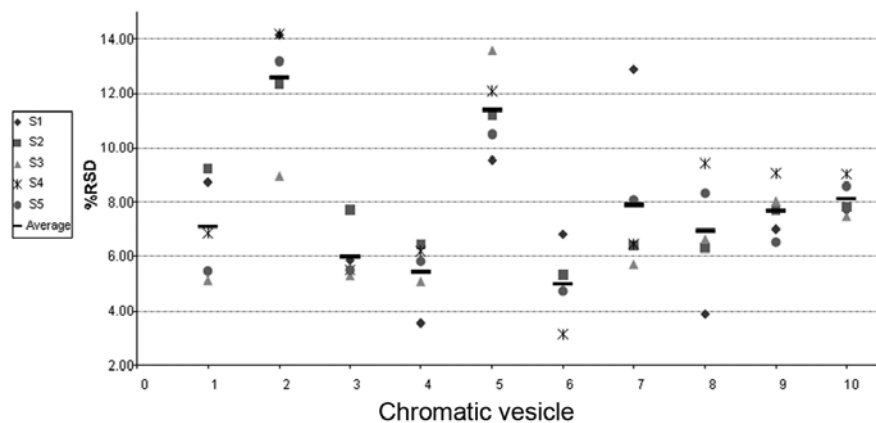

Supplement: Supplementary file 1 [file sensors-12-05572-s001.pdf]
